# Supplementary material for: Combining Fine Mapping, Whole-Genome Re-Sequencing, and RNA-Seq Unravels Candidate Genes for a Soybean Mutant with Short Petioles and Weakened Pulvini
Source: MDPI journal article supplement (doi:10.3390/genes13020185), 2022-01-21
Supplement: s1 [file s1]

# Supplementary Materials

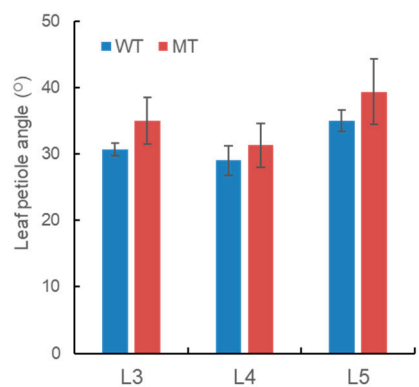

Figure S1. Comparison of the leaf petiole angle between wild-type plants (WT) and mutant-type plants (MT). L3, L4, L5 represented the third to fifth leaf petiole from top to bottom, respectively.

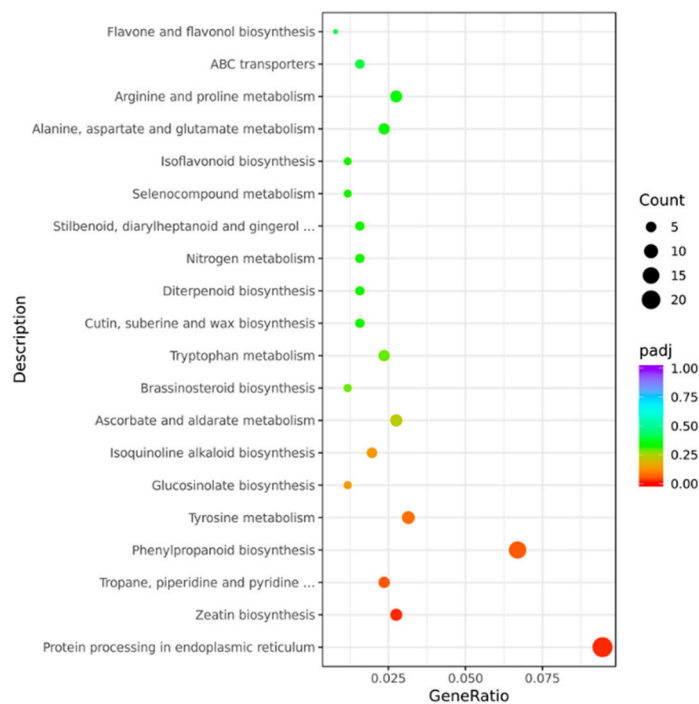

Figure S2. The scatter diagram of Kyoto Encyclopedia of Genes and Genomes (KEGG) enrichment. The GeneRatio means the ratio of the differentially expressed genes (DEGs) number enriched in a pathway to the DEGs number enriched in all pathways. The size of the dot indicates the number of genes and the color of the dot corresponds to the different padj ranges.

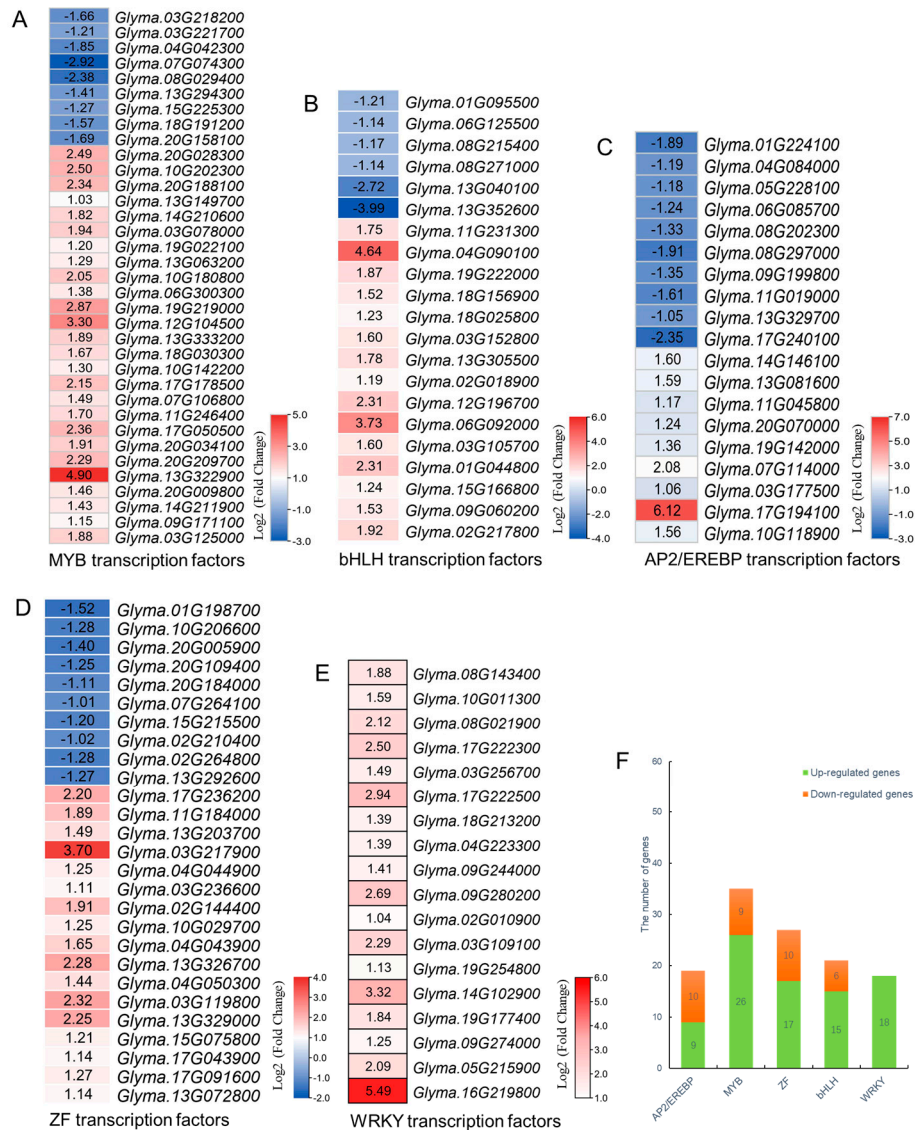

Figure S3. The expression analysis of differentially expressed transcription factors (TFs) based on the RNA-seq data.

(A–E), down-regulated and up-regulated differentially expressed genes (DEGs) in MYB (A), bHLH (B), AP2/EREBP (C), ZF (D), WRKY transcription factor families (E). (F), distribution of DEGs in different TF families.

Table S1. The primers used for mapping *spwp1* locus.

| SSR Marker         | Short name | Forward primer sequences (5'-3') | Reverse primer sequences (5'-3') |
|--------------------|------------|----------------------------------|----------------------------------|
| Satt063            | /          | AAATGATTAACAATGTTTATGAT          | ACTTGCATCAGTTAATAACAA            |
| BARCSOYSSR_14_1367 | S1367      | TGGTTTAGCTACTCATTTTGTCTTT        | TGCATACACCTAAAATCACTTGTT         |
| BARCSOYSSR_14_1373 | S1373      | TGATGGAACCAATTCACAGAAA           | TGCCCTTGTGTGTACCTTCA             |
| BARCSOYSSR_14_1375 | S1375      | TGACATGTGGTGAAGGAGGA             | AGCCTGCAGAAAATTGGAAA             |
| BARCSOYSSR_14_1382 | S1382      | GCGTTTTTAGTATGGATAATGTTTT        | GCGAAGGGACAAGAGTGAT              |
| BARCSOYSSR_14_1390 | S1390      | CCAACGAACATAGGGGTGAT             | GAGTTTCGGAGACCTCAACG             |
| BARCSOYSSR_14_1404 | S1404      | CACACCCCTTTTGTGCTTTT             | AAGCCTGCAAGAGAATCCAA             |
| BARCSOYSSR_14_1413 | S1413      | CCTCGCGGTTCTGTTTATTAT            | CAGTTTCAATGCTGTGCATTTT           |
| BARCSOYSSR_14_1418 | S1418      | CACACAATATTTTGGGAATTTTATCA       | TGTTTTGGTTCTTAACACTTTCACA        |
| BARCSOYSSR_14_1421 | S1421      | GCGATCGTGCAAGAAAATA              | GCGGTGGACTTCGCCTCAAATAAT         |
| BARCSOYSSR_14_1423 | S1423      | TCAGAACAGATTCGCTCCCT             | GGTCTCCGAGAATTGGATCA             |
| BARCSOYSSR_14_1455 | S1455      | AATTGATCTCTGTGCGCCCAA            | TGTTCCACGTTATTTTTGCG             |
| BARCSOYSSR_14_1465 | S1465      | CACACCCTAGAAAAGGGCAA             | CCATCACAACGGAACCTCAA             |
| BARCSOYSSR_14_1498 | S1498      | CGCCTACTAAGTGGATGATGC            | CGGTTGACTTTTAACCAACC             |

Table S2. The primers used for mapping *spwp2* locus.

| SSR Marker         | Short names | Forward primer sequences (5'-3')    | Reverse primer sequences (5'-3') |
|--------------------|-------------|-------------------------------------|----------------------------------|
| Sat_095            | /           | TGGACACGTTGAAAAGAGTAAA<br>AAGTT     | CAGGCCCAAAGTAAATCTGAAAAA         |
| BARCSOYSSR_11_1335 | S1335       | CAATTTTCTCTATTTTCGATCCAT<br>TT      | ACTTCACGTATTATATTTTTCAATGTG      |
| BARCSOYSSR_11_1344 | S1344       | TTTGATACCGACACCCCTTC                | TCTTTTGCTTATGATTAATGTTCC         |
| BARCSOYSSR_11_1360 | S1360       | CGAAGCTTATGACTAGGGTGGA              | CAAAAGCAAAGAGTCTATGTCGC          |
| BARCSOYSSR_11_1373 | S1373       | GCGAGAAAATAATCCTGCTCAA<br>G         | GCGTTTAAGTCCAATAACAAAGATAA<br>C  |
| BARCSOYSSR_11_1385 | S1385       | CCTCCCCTTTTGGTGAGTAA                | TTATGCCTTTTCCCAACAGC             |
| BARCSOYSSR_11_1390 | S1390       | ACGATGGCATTGCAGTCTTT                | CAATATATGCAGGGGAAGGG             |
| BARCSOYSSR_11_1398 | S1398       | TGCTTGAGGAGTGGATCCTT                | CGATTCTTCAAACAGTGCC              |
| BARCSOYSSR_11_1406 | S1406       | CGTAAGCCCTCAACACCATT                | AAATTAGGCATCGACTAGGGC            |
| BARCSOYSSR_11_1445 | S1445       | TGCTCCACCACCTACATCAA                | GTGTTTTCCTGCTGCTCCTC             |
| Sat_331            | /           | GCGGTGAATATCCATCAGCCAT<br>GAAATTATA | GCGTGCCCATTTTGTGGATATTTG<br>TTTG |
| BARCSOYSSR_11_1481 | S1481       | AAAATAGTGGTGCGACCAAA                | CGGCTGAAGTACTGGGAAGT             |

Table S3. List the primers used for qRT-PCR analysis of six candidate genes.

| Gene ID         | Product Size (bp) | Forward strand sequence (5'–3')                   | Illustration                      |
|-----------------|-------------------|---------------------------------------------------|-----------------------------------|
|                 |                   | Reverse strand sequence (5'–3')                   |                                   |
| Glyma.11G229400 | 142               | GTTAGCCATGGTGCTAGACAG<br>TCGAGGAATATCATCACGACAACG | for qRT-PCR                       |
| Glyma.11g230000 | 175               | ATGGCACTGTTCTTATGCCCT<br>TGTGACTGGCCATAATCGTGT    |                                   |
| Glyma.11G230200 | 175               | GCTCTGAGATATGCGGCAG<br>GGACATCTAGGTGGCTTATTGT     |                                   |
| Glyma.11G230300 | 155               | GGAGTGAGACTGGGTCCATTT<br>ACTCCTCATCGCCCTGTCTT     |                                   |
| Glyma.11G230600 | 155               | CGATGTGAATGAGGCCGAGG<br>TGGAAGTGCTGTCATGGCTA      |                                   |
| Glyma.14g206000 | 102               | CCCTCTACACCTCCTCCATCGT<br>CGCAATTGCAATGATAGCTGCC  |                                   |
| Glyma.18G290800 | 142               | CGGTGGTTCTATCTTGGCATC<br>GTCTTCGCTTCAATAACCCTA    | reference gene ( <i>Actin11</i> ) |

Table S4. Summary of re-sequencing data quality of wild type and mutant type DNA pools.

| Samples     | Raw     | Clean   | Effective | Error   | GC     |        |            |
|-------------|---------|---------|-----------|---------|--------|--------|------------|
|             | Base(G) | Base(G) | Rate(%)   | Rate(%) | Q20(%) | Q30(%) | Content(%) |
| Wild type   | 50.58   | 50.17   | 99.18     | 0.03    | 98.29  | 94.71  | 35.88      |
| Mutant type | 51.91   | 51.47   | 99.16     | 0.03    | 98.25  | 94.6   | 35.66      |

Table S5. Mapping information for wild type and mutant type DNA pools by whole genome re-sequencing.

| Samples     | Raw Reads   | No. of total clean read pairs | Mapped rate (%) | Average depth (x) | Genomic coverage (%) |
|-------------|-------------|-------------------------------|-----------------|-------------------|----------------------|
| Wild type   | 168,593,500 | 163,984,765                   | 99.26           | ~31x              | 90.63                |
| Mutant type | 173,032,393 | 168,202,480                   | 97.80           | ~31x              | 90.62                |

Table S6. Throughput and quality of RNA-seq of the *spwp* mutant and wild type (WT).

| sample | raw_reads | clean_reads | unique_map       | error_rate | Q20(%) | Q30(%) | GC(%) |
|--------|-----------|-------------|------------------|------------|--------|--------|-------|
| WT_1   | 40317276  | 38920798    | 36324019(93.33%) | 0.03       | 97.61  | 93.36  | 44.68 |
| WT_2   | 45026344  | 43527798    | 41016346(94.23%) | 0.03       | 97.77  | 93.6   | 44.01 |
| WT_3   | 44987034  | 42132182    | 39421396(93.57%) | 0.03       | 97.76  | 93.65  | 44.59 |
| spwp_1 | 40175250  | 39138766    | 36780942(93.98%) | 0.03       | 97.6   | 93.27  | 44.14 |
| spwp_2 | 44800474  | 43836990    | 41417538(94.48%) | 0.03       | 97.72  | 93.48  | 43.65 |
| spwp_3 | 44270438  | 43446476    | 41152245(94.72%) | 0.03       | 97.79  | 93.64  | 43.18 |

Table S8. The SNPs in the candidate genes detected by the Sanger sequencing.

| Gene            | Physical position in chromosome 11 (bp) | Mutation | Type          | Conversion of AA |
|-----------------|-----------------------------------------|----------|---------------|------------------|
| Glyma.11g230300 | 37434340                                | T→A      | Synonymous    | /                |
|                 | 37434391                                | T→A      | Synonymous    | /                |
|                 | 37434392                                | A→C      | Nonsynonymous | Ser→Arg          |
| Glyma.11g230600 | 37470826                                | G→A      | Synonymous    | /                |
|                 | 37470919                                | T→A      | Synonymous    | /                |
|                 | 37471188                                | T→C      | Nonsynonymous | Ile→Thr          |

Table S9. Auxin-related genes differentially expressed between the *spwp* mutant and wild type (WT).

| Number | Gene Name       | Annotation Description                             | log2FoldChange | <i>spwp</i> <sup>a</sup> | WT <sup>b</sup> | <i>p</i> -value |
|--------|-----------------|----------------------------------------------------|----------------|--------------------------|-----------------|-----------------|
| 1      | Glyma.03G158700 | AUX/IAA family (IAA14)                             | 1.95           | 1283.13                  | 333.10          | 0.021309886     |
| 2      | Glyma.20G210400 | AUX/IAA family (IAA14)                             | 2.08           | 97.30                    | 23.00           | 0.004074022     |
| 3      | Glyma.13G356600 | AUX/IAA family (IAA27)                             | 1.03           | 150.66                   | 73.98           | 0.032051363     |
| 4      | Glyma.07G217900 | Auxin efflux carrier family protein (PIN3A)        | -1.27          | 660.70                   | 1591.54         | 0.001841378     |
| 5      | Glyma.20G014300 | Auxin efflux carrier family protein (PIN3B)        | -1.25          | 378.07                   | 897.59          | 0.001257736     |
| 6      | Glyma.15G091000 | auxin response factor 8 (ARF8)                     | 1.00           | 1923.60                  | 960.91          | 0.020643902     |
| 7      | Glyma.01G114000 | auxin transporter-like protein 1 (LAX1)            | 1.15           | 130.34                   | 58.93           | 0.014096051     |
| 8      | Glyma.03G063600 | auxin transporter-like protein 3 (LAX3)            | 1.43           | 620.80                   | 230.62          | 0.000568943     |
| 9      | Glyma.03G063900 | auxin transporter-like protein 4 (LAX4)            | 1.90           | 59.89                    | 16.05           | 0.033911735     |
| 10     | Glyma.19G161100 | Auxin-regulated protein 28 (AUX28)                 | 3.39           | 201.64                   | 19.22           | 4.08E-05        |
| 11     | Glyma.07G043000 | Dormancy/auxin associated protein                  | 2.73           | 13.12                    | 1.97            | 0.036479849     |
| 12     | Glyma.16G011400 | Dormancy/auxin associated protein                  | 1.74           | 106.09                   | 31.96           | 0.009081428     |
| 13     | Glyma.06G115100 | IAA-leucine resistant (ILR)-like gene 6 (ILL6)     | -1.26          | 90.45                    | 216.09          | 0.000155564     |
| 14     | Glyma.04G006400 | SAUR-like auxin-responsive protein family (SAUR23) | -4.62          | 0.00                     | 4.45            | 0.046521288     |
| 15     | Glyma.19G183700 | SAUR-like auxin-responsive protein family (SAUR48) | -1.65          | 16.33                    | 51.13           | 0.012042824     |
| 16     | Glyma.16G129600 | SAUR-like auxin-responsive protein family (SAUR50) | 2.16           | 12.06                    | 2.71            | 0.046993887     |
| 17     | Glyma.15G182300 | SAUR-like auxin-responsive protein family (SAUR70) | 3.86           | 14.66                    | 1.02            | 0.005671911     |
| 18     | Glyma.17G046000 | SAUR-like auxin-responsive protein family (SAUR78) | 1.63           | 78.72                    | 25.54           | 0.019125912     |

<sup>a, b</sup> represent the mean readcount value of three *spwp* mutant-type (*spwp*) and wild-type (WT) samples after standardization, respectively.
